# Supplementary material for: METTL14 aggravates podocyte injury and glomerulopathy progression through N6-methyladenosine-dependent downregulating of Sirt1
Source: PubMed Central journal article supplement (PMC8476597; doi:10.1038/s41419-021-04156-y), 2021-09-27

Fig. S2A

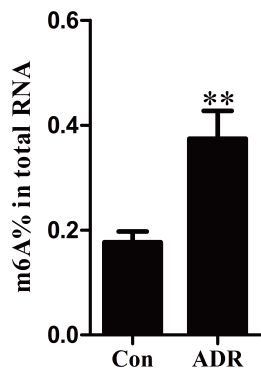

Fig. S2B

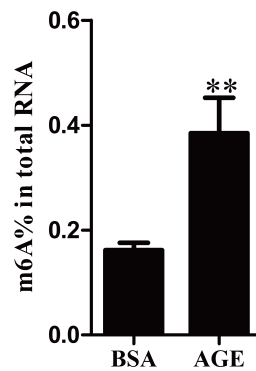

Fig. S3

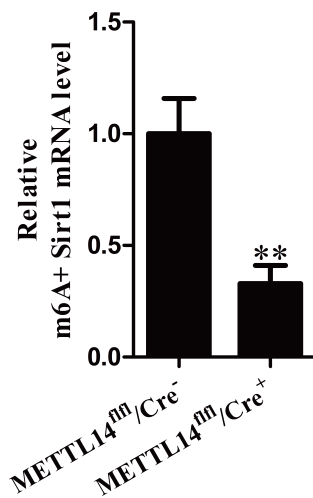

Supplement: 41419_2021_4156_MOESM2_ESM.pdf [file 41419_2021_4156_MOESM2_ESM.pdf]
