# Supplementary material for: METTL14 aggravates podocyte injury and glomerulopathy progression through N6-methyladenosine-dependent downregulating of Sirt1
Source: PubMed Central journal article supplement (PMC8476597; doi:10.1038/s41419-021-04156-y), 2021-09-27
Supplement: 41419_2021_4156_MOESM3_ESM.pdf [file 41419_2021_4156_MOESM3_ESM.pdf]

1 **Supplemental Figure Legend**

2 **Fig. S1. The elevated METTL14-mediated RNA m6A modification in isolated**  
3 **glomeruli from ADR-treated mice and diabetic db/db mice.** (A) The m6A levels of  
4 total RNAs in isolated glomeruli from kidneys of ADR-treated mice and their  
5 corresponding controls quantified by colorimetric ELISA assay. (n=4). (B) The m6A  
6 contents of total RNAs in isolated glomeruli from kidneys of diabetic db/db mice and  
7 control db/m mice. (n=4). (C) Quantitative RT-PCR analysis of major methyltransferases  
8 and demethyltransferases in isolated glomeruli from mice with ADR treatment or normal  
9 controls. (n=4.) (D) Quantitative RT-PCR analysis of major m6A modifying enzymes in  
10 isolated glomeruli from db/db mice compared with control db/m mice. (n=4). (E)  
11 Representative western blots and statistical analysis of METTL14 in isolated glomeruli  
12 from kidneys of saline- or ADR-treated mice. (n=4). (F) Representative western blots and  
13 statistical analysis of METTL14 in isolated glomeruli from kidneys of db/db mice and  
14 control db/m mice. (n=4). Data are presented as mean  $\pm$  SEM. \*P < 0.05, \*\*P < 0.01 vs.  
15 control group.

16 **Fig. S2. The up-regulated RNA m6A levels in human cultured podocytes under ADR**  
17 **or AGE condition.** (A) The m6A levels of total RNAs in human cultured podocytes with  
18 0.4  $\mu$ g/ml ADR treatment and their normal controls quantified by colorimetric ELISA  
19 assay. (n=6). (B) The m6A contents of total RNAs in human cultured podocytes treated  
20 with 50  $\mu$ g/ml AGE or BSA. (n=6).

1 **Fig. S3. The decreased m6A modification of Sirt1 mRNA in isolated glomeruli of**  
2 **mice with podocyte-specific METTL14 deletion.** Relative methylated Sirt1 mRNA  
3 levels in isolated glomeruli from METTL14<sup>flox/flox</sup>/Cre<sup>+</sup> mice compared with those from  
4 wild-type mice. (n=4).
