# Supplementary material for: METTL14 aggravates podocyte injury and glomerulopathy progression through N6-methyladenosine-dependent downregulating of Sirt1
Source: PubMed Central journal article supplement (PMC8476597; doi:10.1038/s41419-021-04156-y), 2021-09-27
Supplement: 41419_2021_4156_MOESM4_ESM.pdf [file 41419_2021_4156_MOESM4_ESM.pdf]

**Supplemental Table.** Primers for quantitative RT-PCR

| Primer name         | Primer sequences |                                |
|---------------------|------------------|--------------------------------|
| Mouse METTL3        | forward          | 5'-CTGGGGCACTTGGATTTAAGGAA-3'  |
|                     | reverse          | 5'-TGAGAGGTGGTGTAGCAACTT-3'    |
| Mouse METTL14       | forward          | 5'-GAGCTGAGAGTGCCGATAGC-3'     |
|                     | reverse          | 5'-GCAGATGTATCATAGGAAGCCC-3'   |
| Mouse WTAP          | forward          | 5'-GAACCTCTTCCTAAAAAGGTCCG-3'  |
|                     | reverse          | 5'-TTAACTCATCCCGTGCCATAAC-3'   |
| Mouse FTO           | forward          | 5'-GACACTTGGCTTCCTTACCTG-3'    |
|                     | reverse          | 5'-CTCACCACGTCCCGAAACAA-3'     |
| Mouse ALKBH5        | forward          | 5'-GCATACGGCCTCAGGACATTA-3'    |
|                     | reverse          | 5'-TTCCAATCGCGGTGCATCTAA-3'    |
| Human METTL14       | forward          | 5'-AGTGCCGACAGCATTGGTG-3'      |
|                     | reverse          | 5'-GGAGCAGAGGTATCATAGGAAGC-3'  |
| Mouse MCP-1         | forward          | 5'-TAAAAACCTGGATCGGAACCAA-3'   |
|                     | reverse          | 5'-GCATTAGCTTCAGATTTACGGGT-3'  |
| Mouse IL-6          | forward          | 5'-TAGTCCTTCCTACCCCAATTTCC-3'  |
|                     | reverse          | 5'-TTGGTCCTTAGCCACTCCTTC-3'    |
| Mouse TNF- $\alpha$ | forward          | 5'-CCCTCACACTCAGATCATCTTCT-3'  |
|                     | reverse          | 5'-GCTACGACGTGGGCTACAG-3'      |
| Human MCP-1         | forward          | 5'-CAGCCAGATGCAATCAATGCC-3'    |
|                     | reverse          | 5'-TGGAATCCTGAACCCACTTCT-3'    |
| Human IL-6          | forward          | 5'-CCTTCAAAGATGGCTGAAA-3'      |
|                     | reverse          | 5'-GCTCTGGCTTGTTCCTCACT-3'     |
| Human TNF- $\alpha$ | forward          | 5'-GAGGCCAAGCCCTGGTATG-3'      |
|                     | reverse          | 5'-CGGGCCGATTGATCTCAGC-3'      |
| Human Sirt1         | forward          | 5'-TAGCCTTGTCAGATAAGGAAGGA-3'  |
|                     | reverse          | 5'-ACAGCTTCACAGTCAACTTTGT-3'   |
| 18S                 | forward          | 5'-CGGCTACCACATCCAAGGAA-3'     |
|                     | reverse          | 5'-CCTGTATTGTTATTTTCGTCACCT-3' |
